# Supplementary material
Source: Royal Society of Chemistry journal article supplement (doi:10.1039/d6ce00302h)
Supplement: d6ce00302h1.pdf [file d6ce00302h1.pdf]

## Supplementary Information

# **Continuous Control of Thermal Responses in Dynamic Crystals via Solid Solution Engineering**

Jiantao Meng,<sup>a</sup> Yahui Su,<sup>b</sup> Hang Zhu,<sup>a</sup> Wenrui Chen,<sup>a</sup> An Chen,<sup>b</sup> Yuan Su,<sup>\*b</sup> and Ting Cai<sup>\*ab</sup>

<sup>a</sup> State Key Laboratory of Natural Medicines, Department of Pharmaceutics, School of Pharmacy, China Pharmaceutical University, Nanjing 211198, China

<sup>b</sup> Department of Pharmaceutical Engineering, School of Engineering, China Pharmaceutical University, Nanjing 211198, China

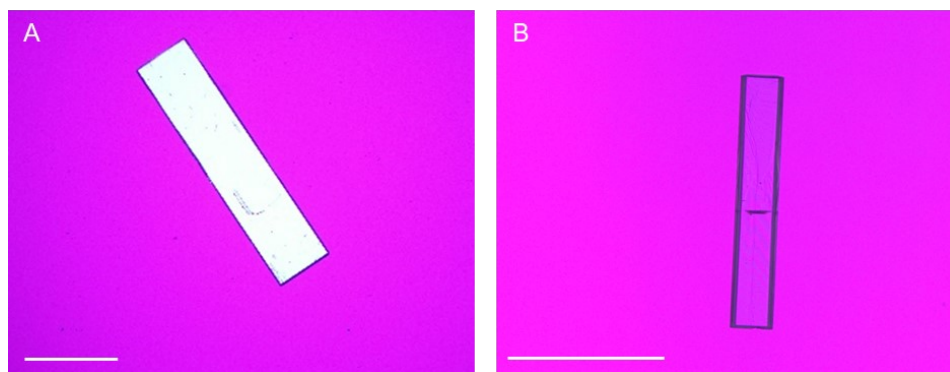

Figure S1. Single-crystal morphologies of PCV (A) and GCV (B). Scale bar = 200  $\mu\text{m}$ .

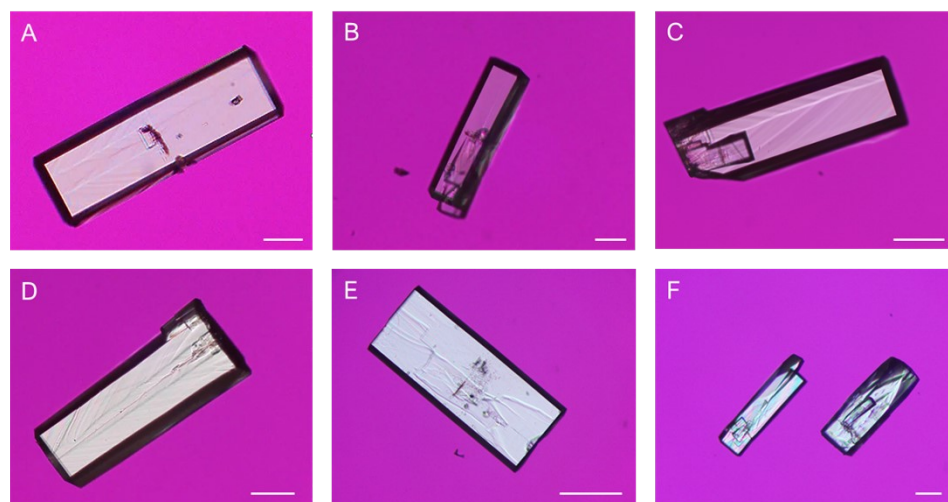

Figure S2. Single-crystal morphologies of solid solutions. Panels A-F correspond to  $\text{PCV}_{0.90}\text{-GCV}_{0.10}$ ,  $\text{PCV}_{0.80}\text{-GCV}_{0.20}$ ,  $\text{PCV}_{0.75}\text{-GCV}_{0.25}$ ,  $\text{PCV}_{0.70}\text{-GCV}_{0.30}$ ,  $\text{PCV}_{0.50}\text{-GCV}_{0.50}$ , and  $\text{PCV}_{0.10}\text{-GCV}_{0.90}$ , respectively. Scale bar = 100  $\mu\text{m}$ .

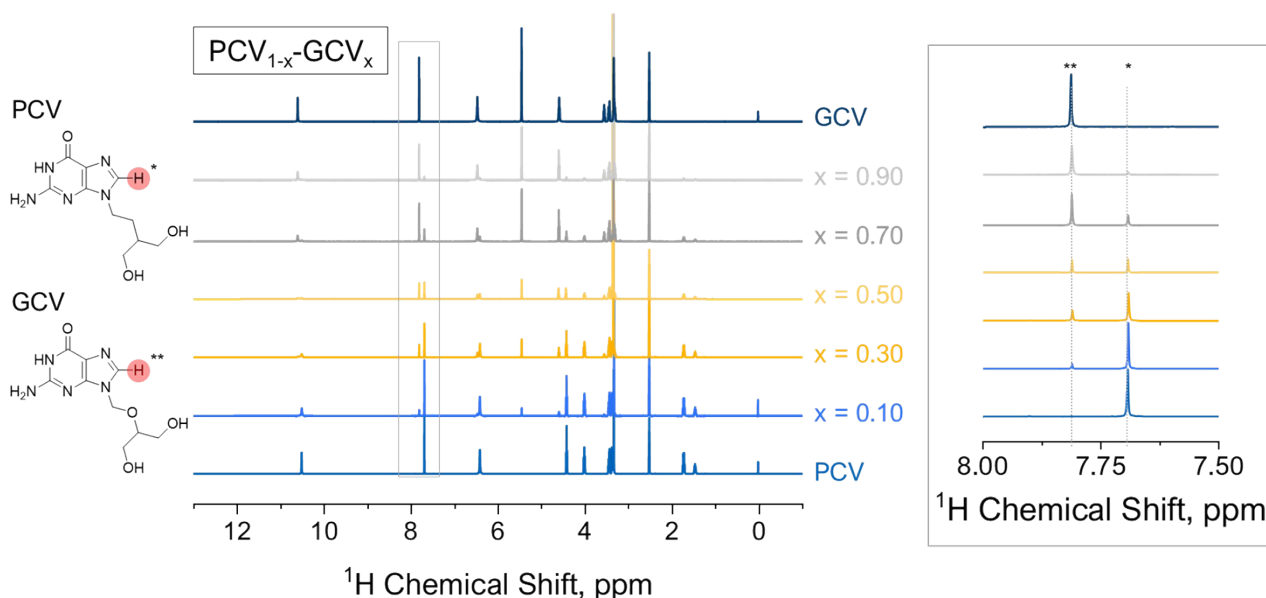

Figure S3.  $^1\text{H}$ -NMR spectra of the solid-solution single crystals. The non-labile proton on the aromatic heterocycle (peak at  $\sim 7.75$  ppm) was used to quantify the stoichiometric ratios of the solid solutions.

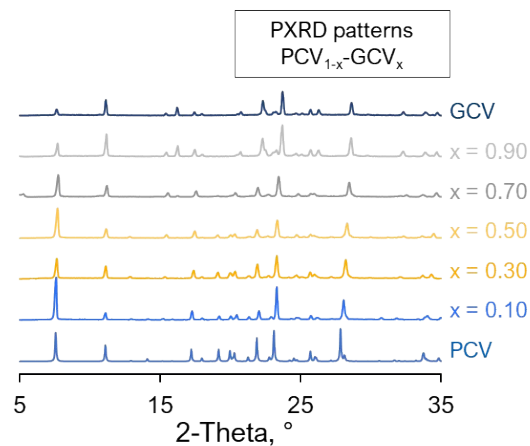

Figure S4. PXRD patterns of the solid solutions. The similarity of the diffraction profiles and the gradual shift in peak positions indicate that these crystals possess comparable structures, which progressively vary with composition.

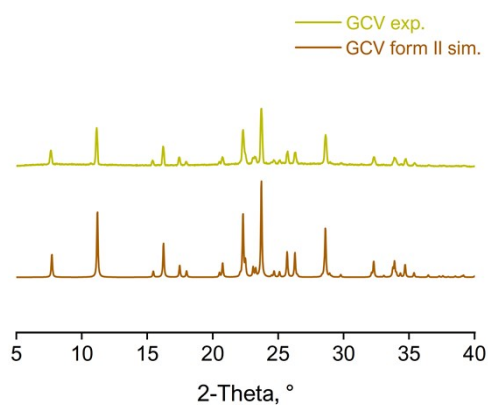

Figure S5. PXRD patterns of the GCV form II. The experimental results correspond well with the simulated results from the single crystal structure (CCDC: 714337).

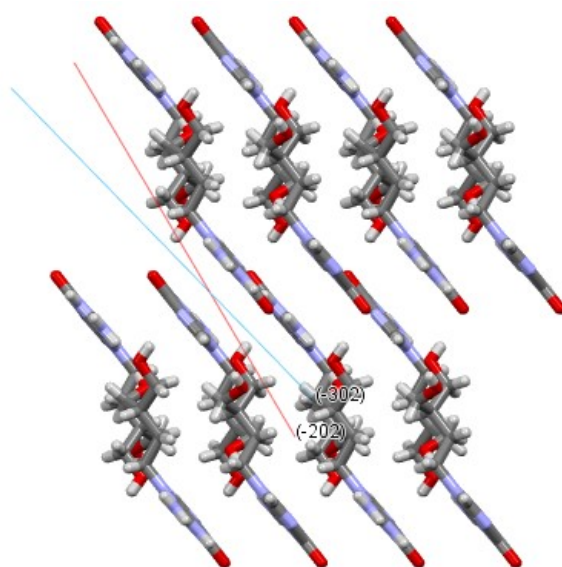

Figure S6. The layered structure of PCV is approximately parallel to the  $(\bar{2}02)$  and  $(\bar{3}02)$  planes.

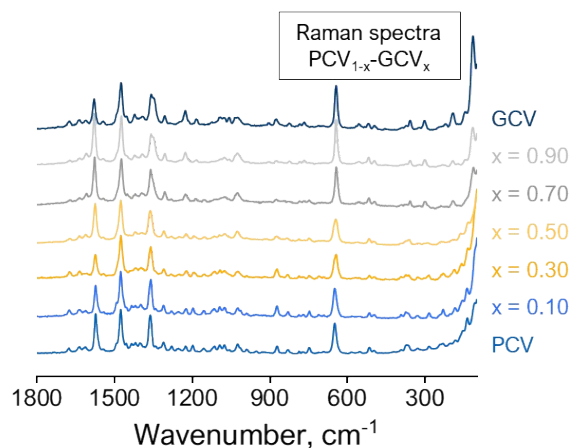

Figure S7. Raman spectra of the solid solutions. The comparable spectral profiles and gradual shifts in characteristic peaks suggest that the crystals share similar structures, while exhibiting progressive structural variations with changing composition.

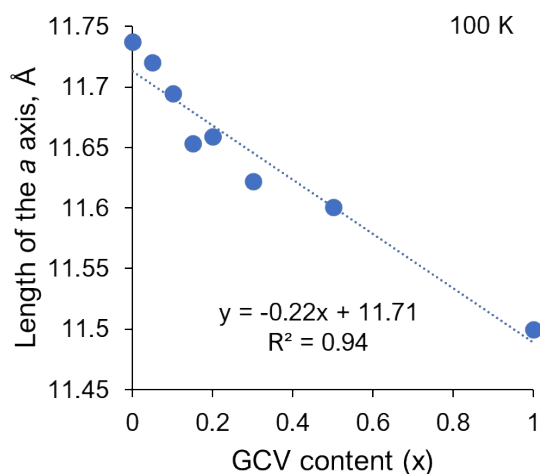

Figure S8. Variation of the  $a$ -axis parameter of PCV, the solid solutions, and GCV at 100 K as a function of composition.

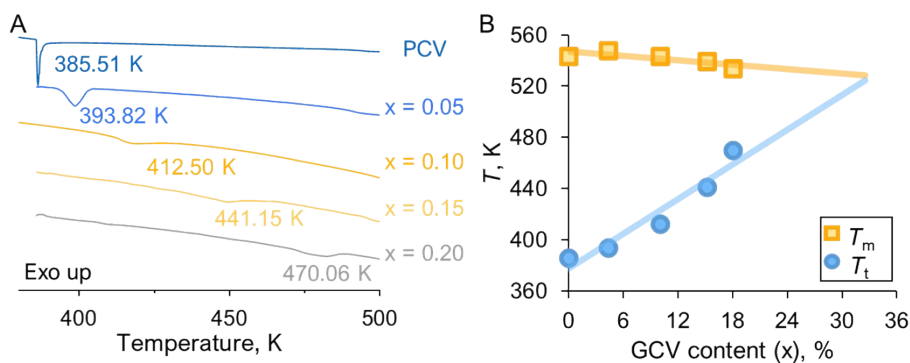

Figure S9. (A) DSC profile recorded by heating the solid solutions over the temperature of the phase transition. (B) The  $T_t$  and  $T_m$  as a function of GCV content. Solid solutions with GCV content over 30% don't exhibit phase transition behaviors.

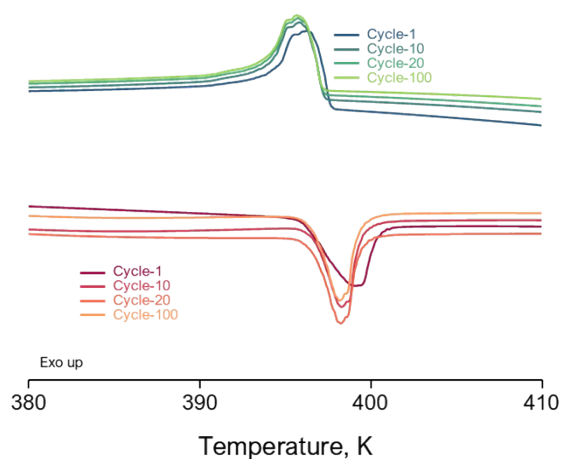

Figure S10. Phase transition signals of PCV<sub>0.95</sub>-GCV<sub>0.05</sub> under different heating-cooling cycles recorded by DSC, demonstrating excellent thermal stability and fatigue resistance of the crystal.

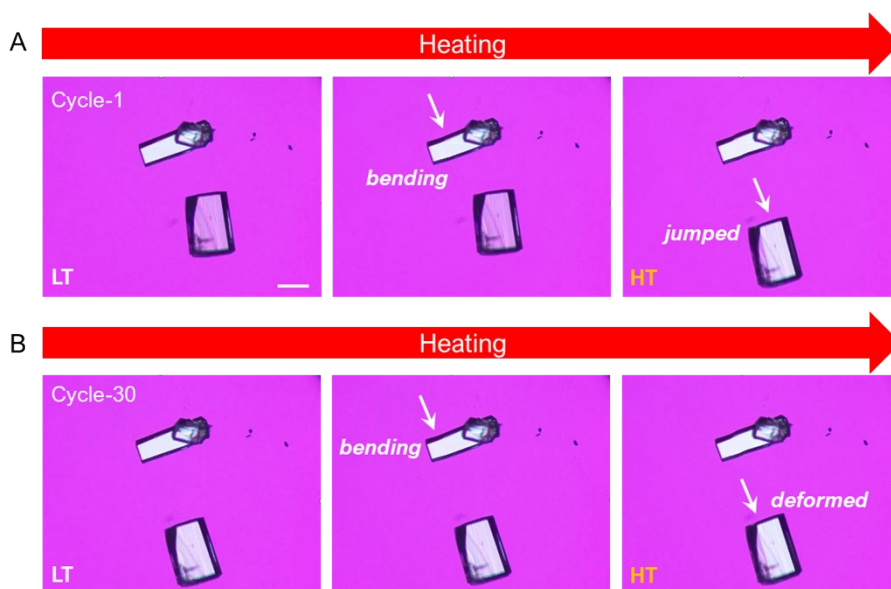

Figure S11. Phase transition behavior of PCV<sub>0.95</sub>-GCV<sub>0.05</sub> observed by HS-PLM during the first and 30<sup>th</sup> heating-cooling cycles, illustrating the crystal's excellent fatigue resistance.

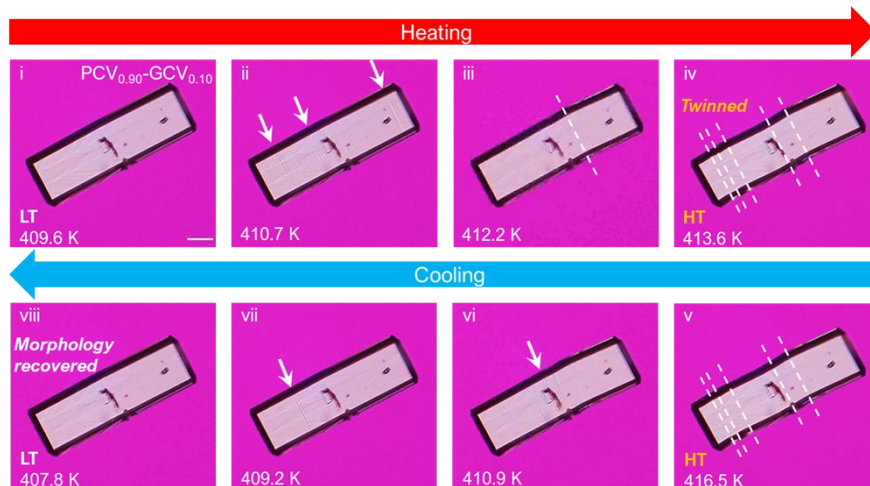

Figure S12. Reversible bending and morphology recovery of  $\text{PCV}_{0.90}\text{-GCV}_{0.10}$  during the phase transition, resembling the behavior of PCV crystals. The arrows indicate the phase front, while the dashed lines mark the formation of twin boundaries. Scale bar = 100  $\mu\text{m}$ .

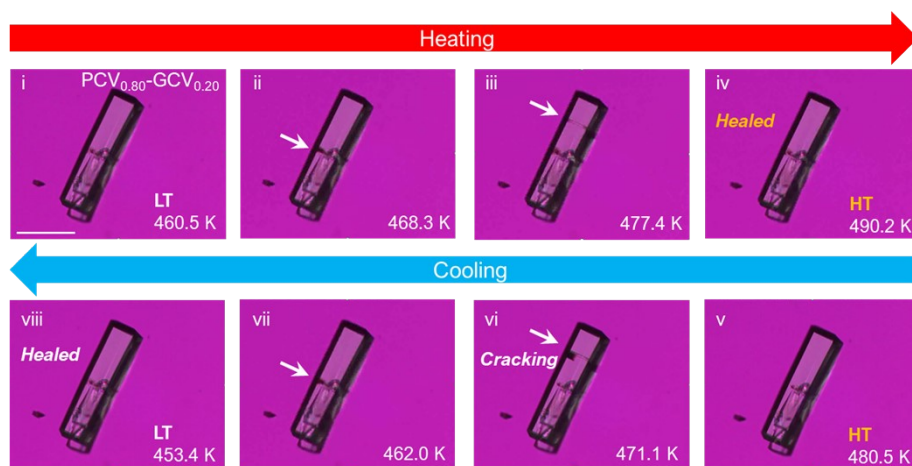

Figure S13. Cracking and self-healing behaviors of  $\text{PCV}_{0.80}\text{-GCV}_{0.20}$  during the phase transition. The arrows indicate the formation of cracks. Scale bar = 100  $\mu\text{m}$ .

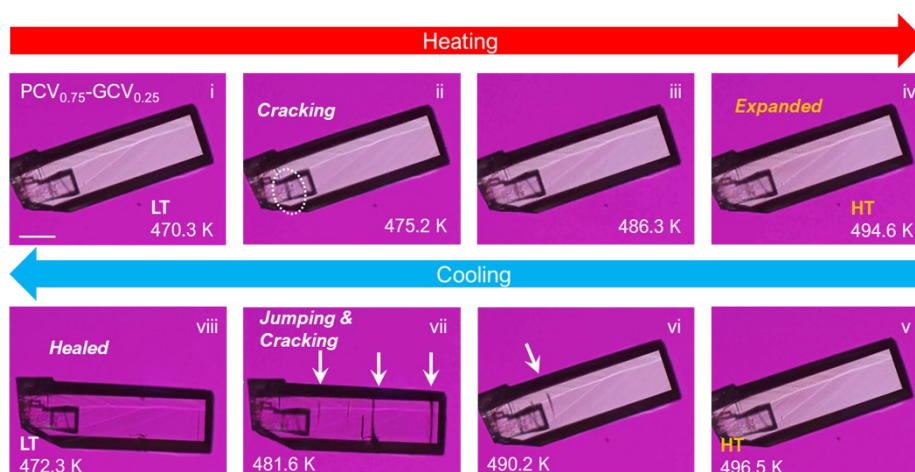

Figure S14. Cracking and self-healing behaviors of  $\text{PCV}_{0.75}\text{-GCV}_{0.25}$  during the phase transition. The arrows indicate the formation of cracks. The crystal exhibited jumping during this process. Scale bar = 100  $\mu\text{m}$ .

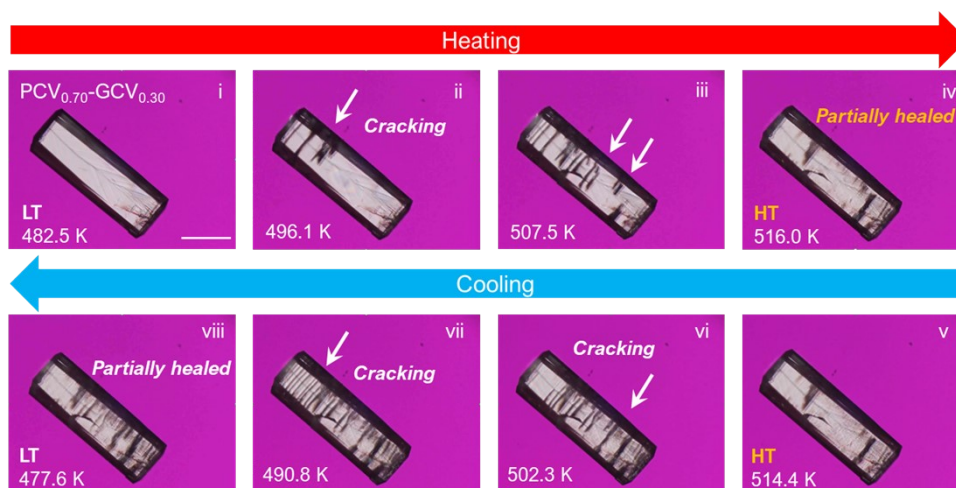

Figure S15. Cracking and self-healing behaviors of  $\text{PCV}_{0.70}\text{-GCV}_{0.30}$  during the phase transition. The arrows indicate the formation of cracks. Due to the severe cracking and the  $T_t$  being close to the  $T_m$ , the crystal exhibited only partial self-healing. Scale bar = 100  $\mu\text{m}$ .

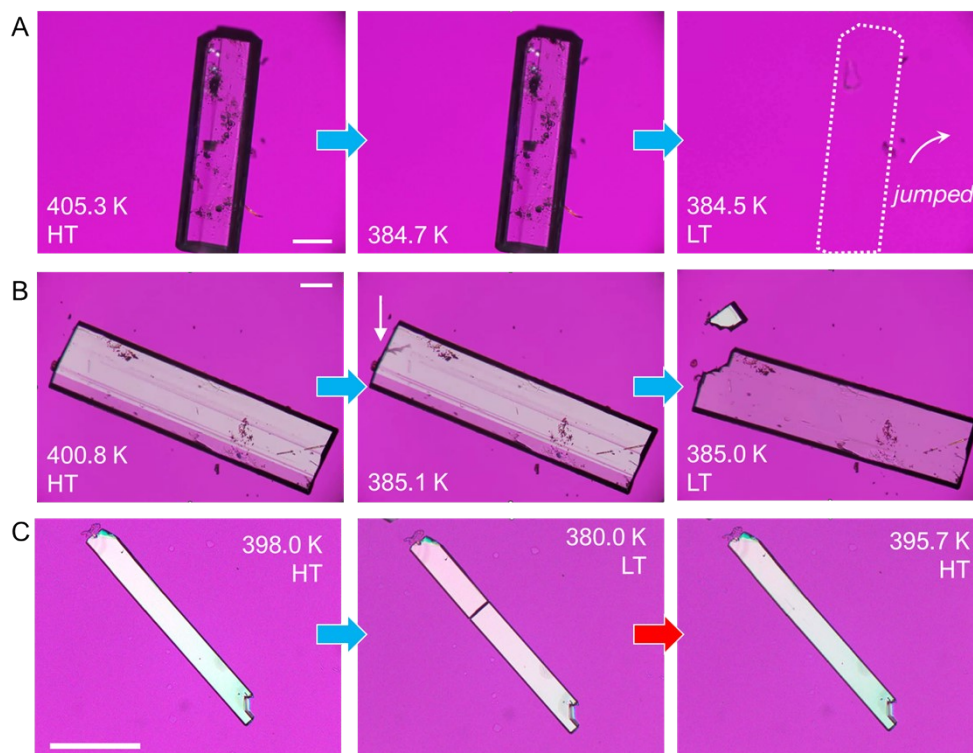

Figure S16. Thermosolient and self-healing effects of PCV crystals. (A) Jumping and (B) cracking observed during the thermosolient effect. (C) Cracking and self-healing observed during phase transition cycles. Scale bar = 100  $\mu\text{m}$ .

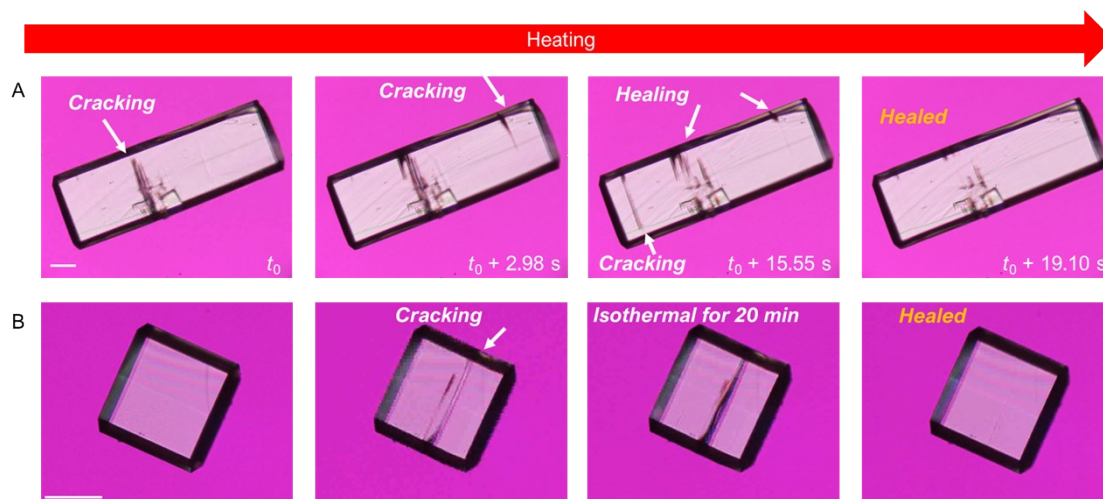

Figure S17. Cracking and self-healing behavior of  $\text{PCV}_{0.85}\text{-GCV}_{0.15}$  during heating. (A) Cracking and slow healing of the crystal at a heating rate of  $20 \text{ K min}^{-1}$ ; the healing time for an individual crack is typically longer than 15 s. (B) Cracks can remain dynamically stable for at least 20 min during the phase transition under isothermal conditions. Scale bar =  $100 \mu\text{m}$ .

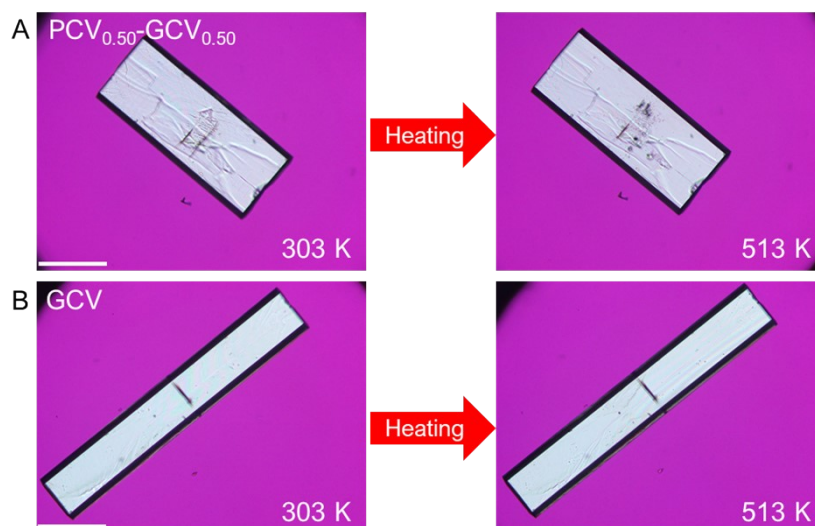

Figure S18.  $\text{PCV}_{0.50}\text{-GCV}_{0.50}$  and GCV crystals did not exhibit any mechanical responses over the temperature range from room temperature to near their  $T_m$ . Scale bar =  $100 \mu\text{m}$ .

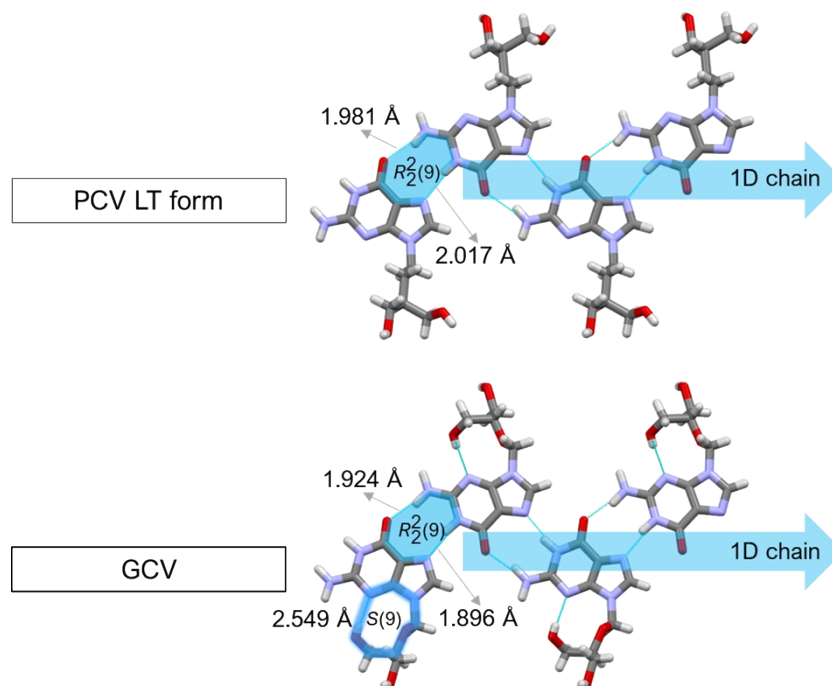

Figure S19. Structural motifs of the PCV LT form and GCV. In both crystals, the molecules form one-dimensional (1D) chain structures along the *b*-axis through dimerization ( $R_2^2(9)$ ).

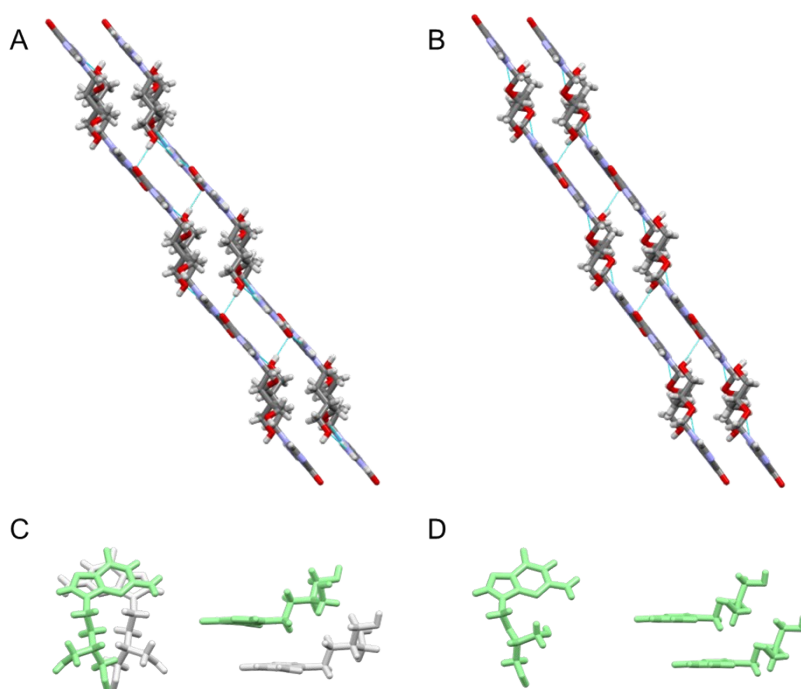

Figure S20. (A-B) Schematic representation of the layered packing and interlayer hydrogen bonds in PCV (left) and GCV (right). (C-D)  $\pi \dots \pi$  stacking arrangements in PCV (left) and GCV (right). Due to the different space groups, the two crystals exhibit distinct aromatic stacking patterns.

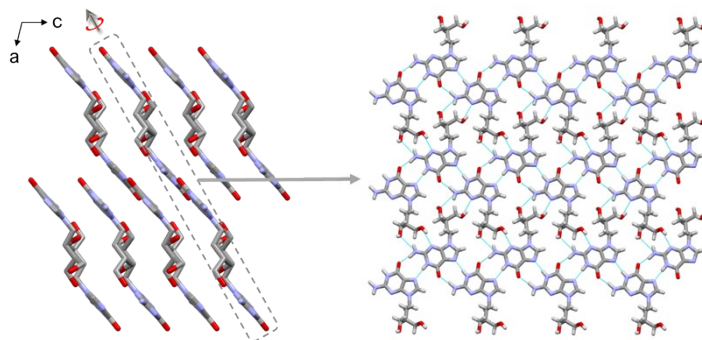

Figure S21. Layered packing and intralayer structures of the  $\text{PCV}_{0.90}\text{-GCV}_{0.10}$  LT form. This crystal exhibit nearly identical structures to PCV crystal.

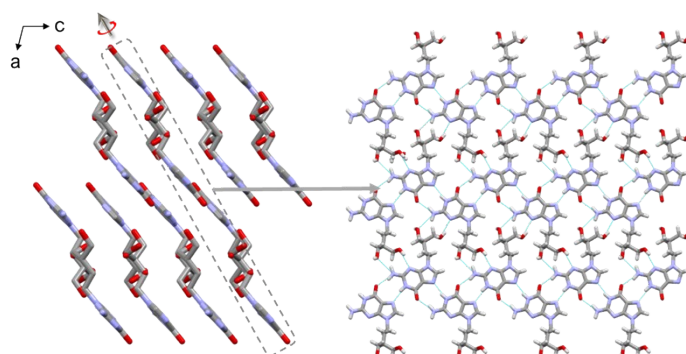

Figure S22. Layered packing and intralayer structures of the  $\text{PCV}_{0.70}\text{-GCV}_{0.30}$  LT form. This crystal exhibit nearly identical structures to PCV crystal.

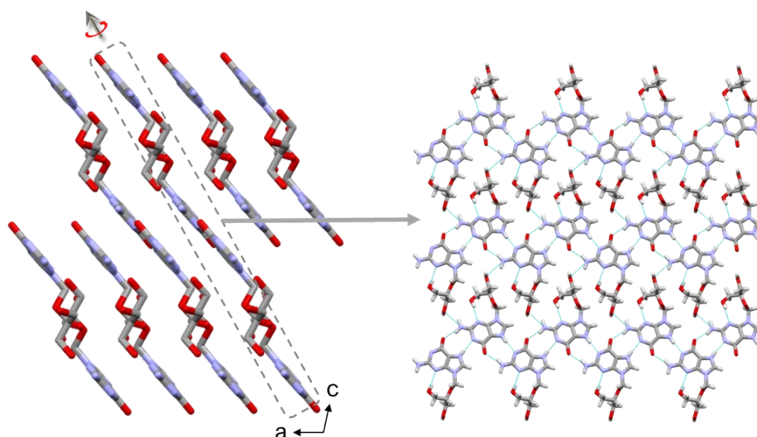

Figure S23. Layered packing and intralayer structures of the  $\text{PCV}_{0.50}\text{-GCV}_{0.50}$ . This crystal exhibit nearly identical structures to GCV crystal.

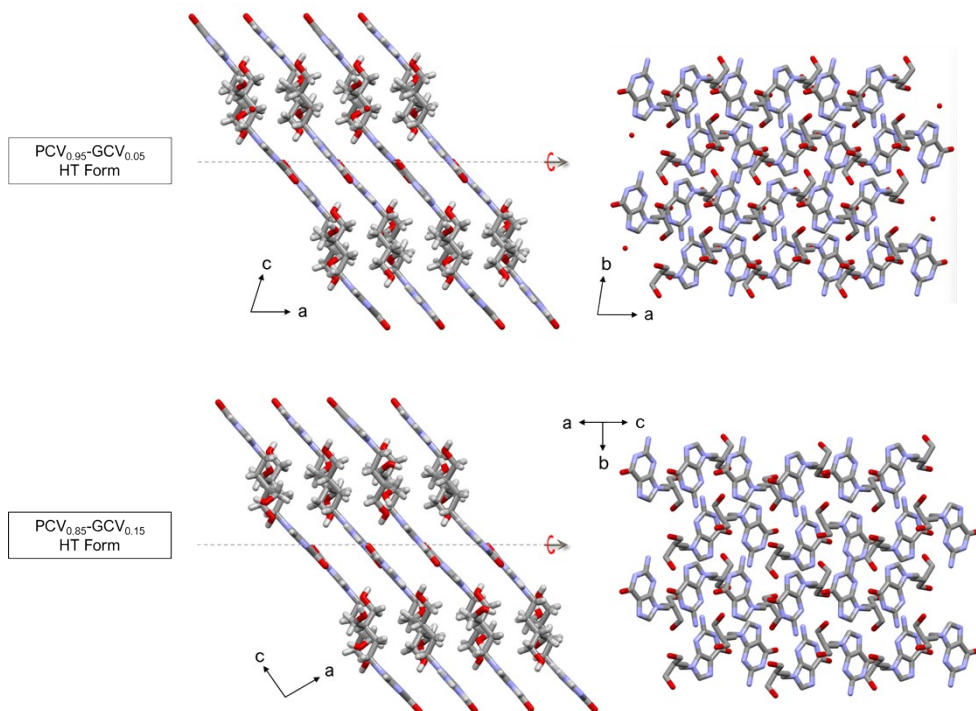

Figure S24. Packing patterns of the HT forms of  $\text{PCV}_{0.95}\text{-GCV}_{0.05}$  and  $\text{PCV}_{0.85}\text{-GCV}_{0.15}$ . The two crystals differ in space group and lattice parameters:  $\text{PCV}_{0.95}\text{-GCV}_{0.05}$  crystallizes in a triclinic system with  $\alpha$  and  $\gamma$  angles deviating from  $90^\circ$ , whereas  $\text{PCV}_{0.85}\text{-GCV}_{0.15}$  retains an orthogonal  $b$ -axis.

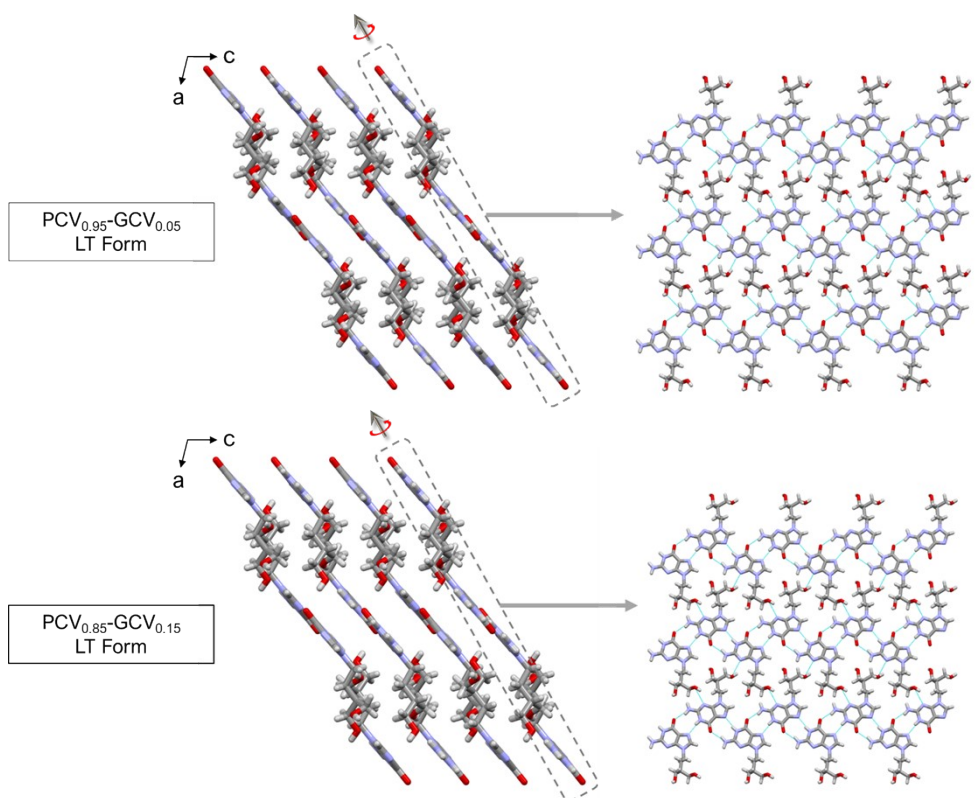

Figure S25. Layered packing of the  $\text{PCV}_{0.95}\text{-GCV}_{0.05}$  and  $\text{PCV}_{0.85}\text{-GCV}_{0.15}$  LT form. This crystal exhibit nearly identical structures to PCV crystal.

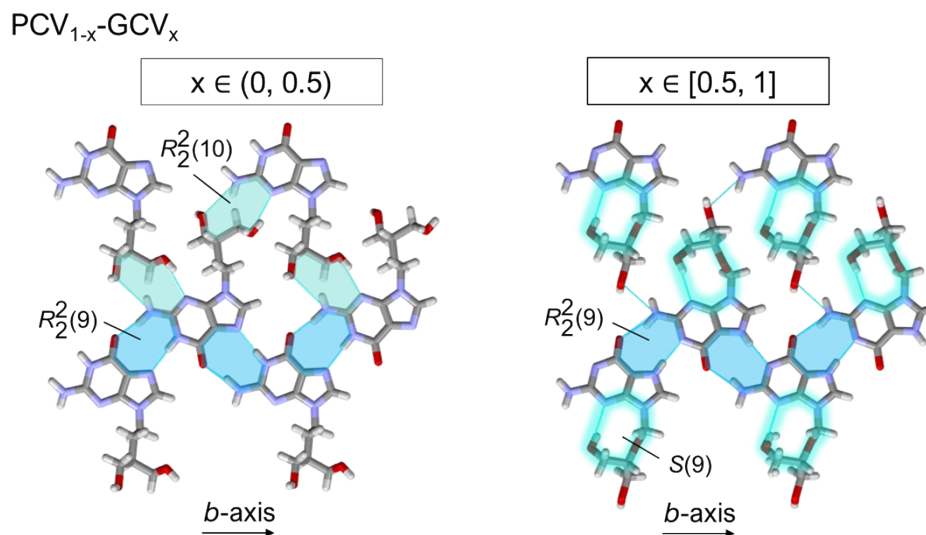

Figure S26. Structural motifs of solid solutions. In all crystals, the molecules form one-dimensional (1D) chain structures along the  $b$ -axis through dimerization ( $R_2^2(9)$ ).

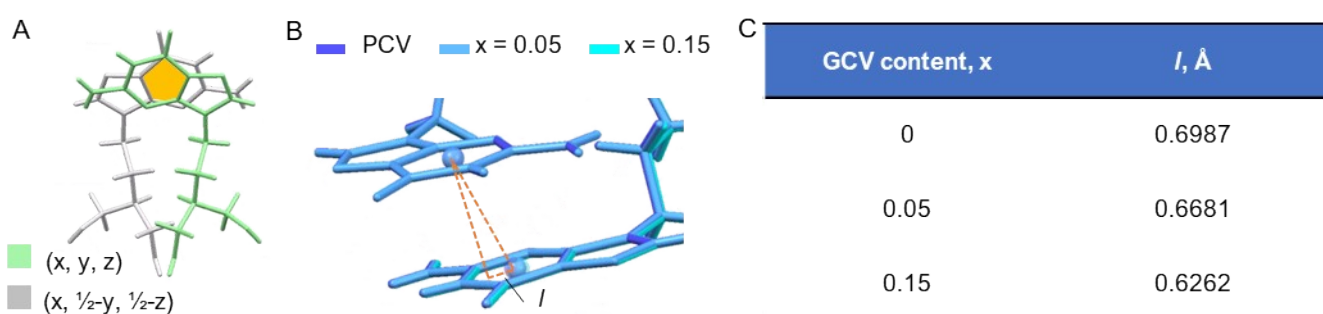

Figure S27. (A)  $\pi \dots \pi$  stacking arrangement in the PCV crystal and solid solutions; the gray and green molecules represent two PCV molecules with different orientations. (B) Overlay views of the molecular packing of PCV, PCV<sub>0.95</sub>-GCV<sub>0.05</sub> and PCV<sub>0.85</sub>-GCV<sub>0.15</sub>, highlighting the centroid-centroid distances. (C) The horizontal component of the centroid-centroid distance. The data points of PCV<sub>0.90</sub>-GCV<sub>0.10</sub> and PCV<sub>0.70</sub>-GCV<sub>0.30</sub> were not presented here due to the different test temperature.

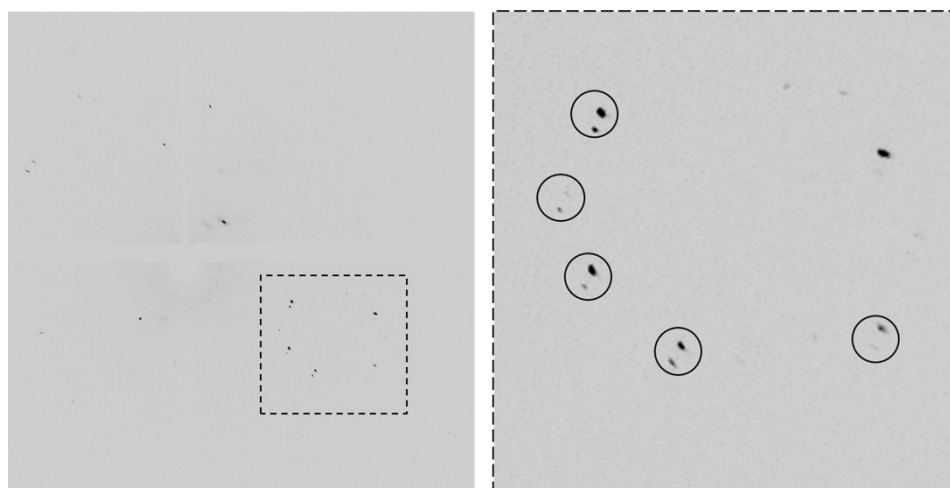

Figure S28. Two-dimensional diffraction patterns of a twinned  $\text{PCV}_{0.95}\text{-GCV}_{0.05}$  crystal at 420 K.

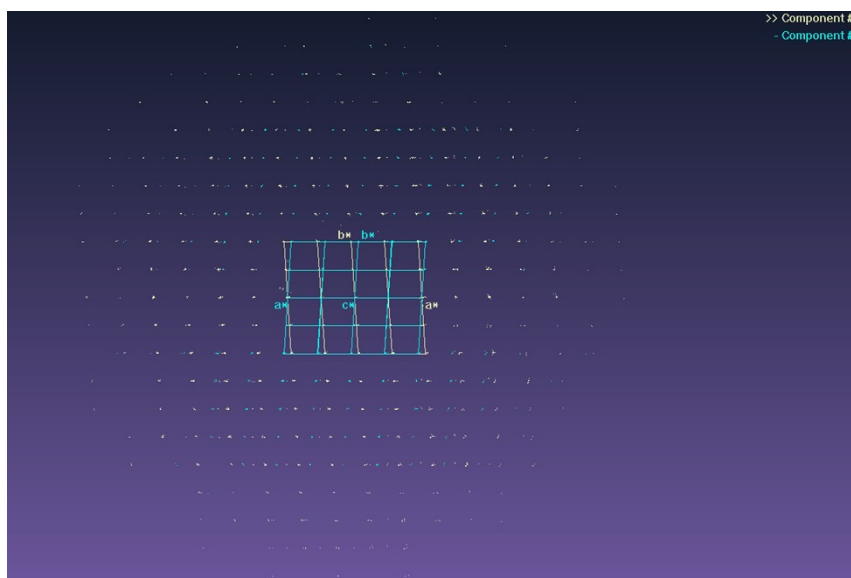

Figure S29. Ewald's diffraction sphere of a twinned  $\text{PCV}_{0.95}\text{-GCV}_{0.05}$  crystal at 420 K.

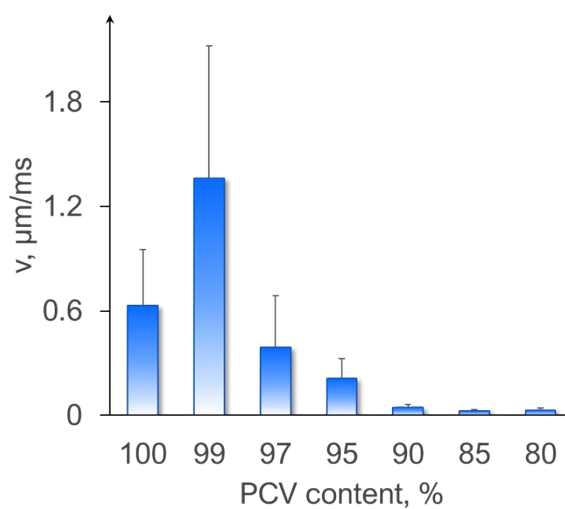

Figure S30. Variation of phase transition rate with composition.

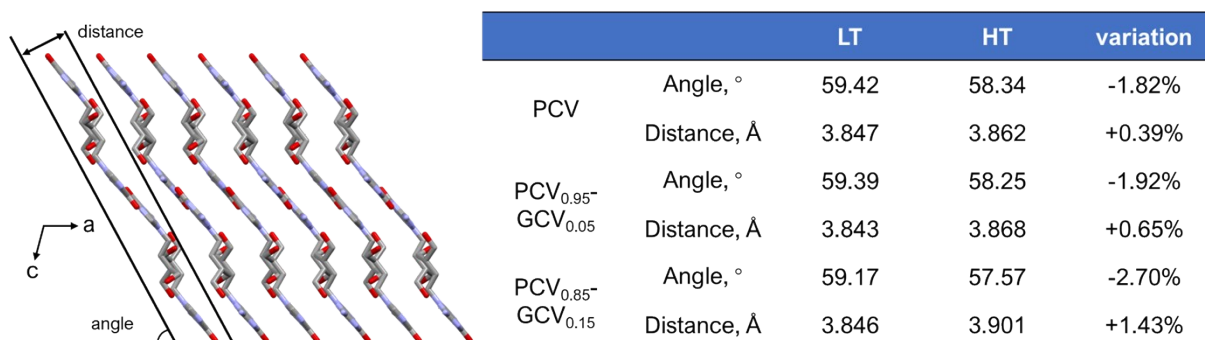

Figure S31. Interlayer distance and the angle (between the  $(100)$  to  $(10\bar{1})$ ) of the  $\text{PCV}_{0.95}\text{-GCV}_{0.05}$  and  $\text{PCV}_{0.85}\text{-GCV}_{0.15}$ .

GCV<sub>0.15</sub> two forms.

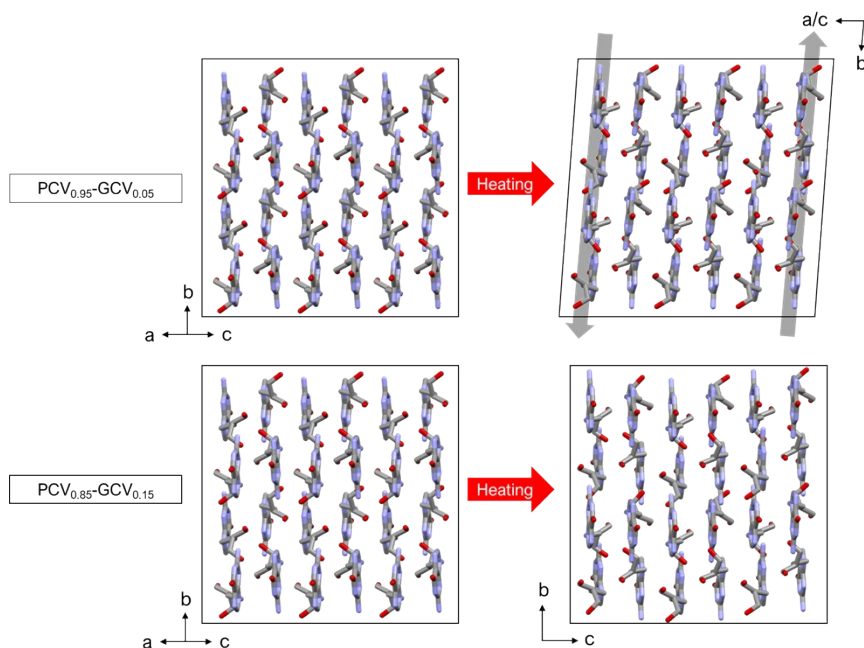

Figure S32. Layered structures of PCV<sub>0.95</sub>-GCV<sub>0.05</sub> and PCV<sub>0.85</sub>-GCV<sub>0.15</sub> observed perpendicular to the *b*-axis. The analysis reveals that the molecular layers of PCV<sub>0.95</sub>-GCV<sub>0.05</sub> undergo relative slippage along the *b*-axis (follow the gray arrows) during the phase transition.

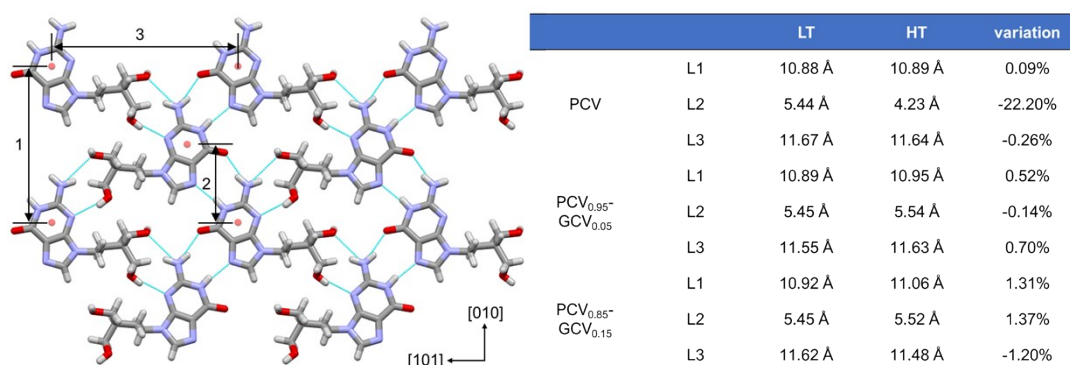

Figure S33. Layered structures of PCV<sub>0.95</sub>-GCV<sub>0.05</sub> and PCV<sub>0.85</sub>-GCV<sub>0.15</sub> observed perpendicular to the *b*-axis.

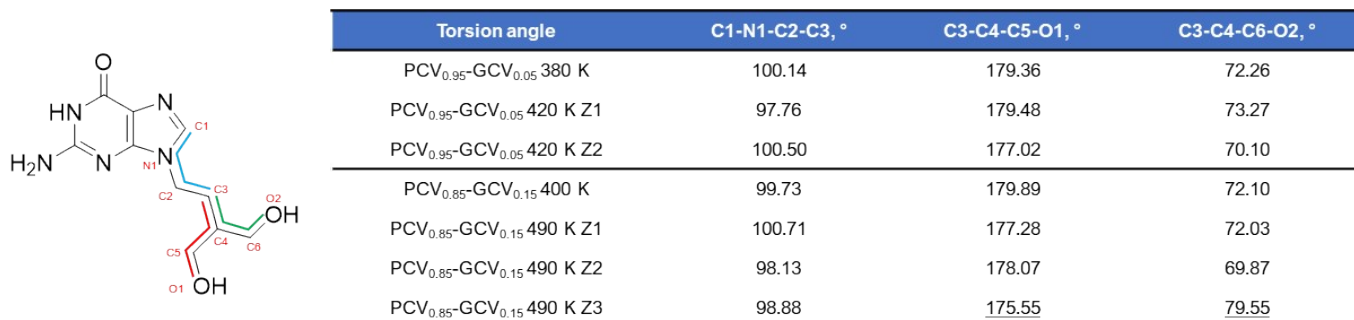

Figure S34. Molecular structure of PCV, featuring a rigid aromatic ring and a flexible side chain. Atom labels and colored lines are drawn to determine torsion angles and analyze conformational changes during the phase

transition.

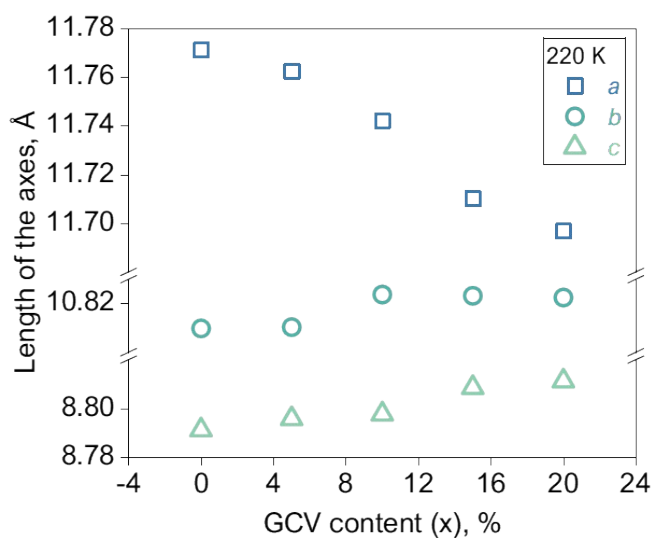

Figure S35. Summary of the unit cell parameters of PCV crystal and the solid solutions at 220 K. The plots show the temperature-dependent changes of the *a*, *b*, and *c* axes.

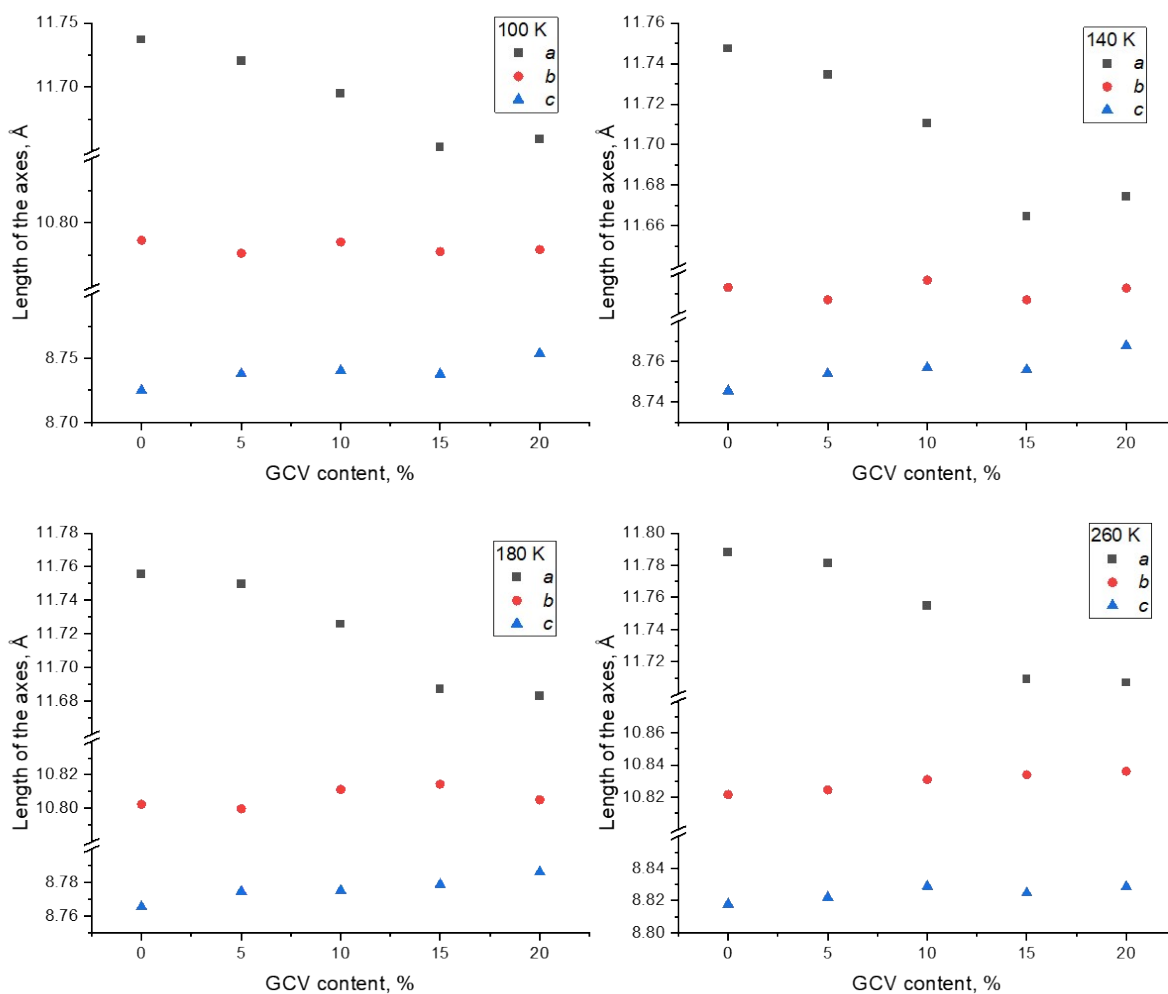

Figure S36. Summary of the unit cell parameters of PCV crystal and the solid solutions at different

temperatures. The plots show the temperature-dependent changes of the  $a$ ,  $b$ , and  $c$  axes.

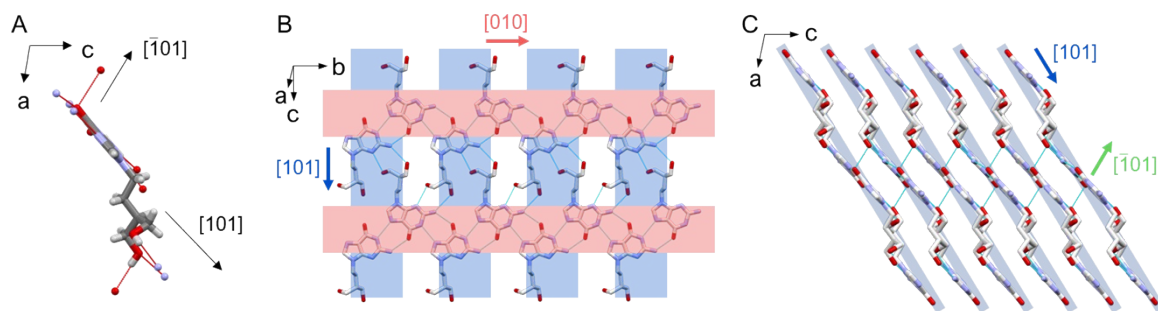

Figure S37. Intermolecular hydrogen-bonding motifs in PCV crystal and the solid solutions. Intermolecular hydrogen bond in a molecular (A), motif (B), and packing views (mainly in crystallographic directions of  $[010]$ ,  $[101]$ , and  $[10\bar{1}]$ ).

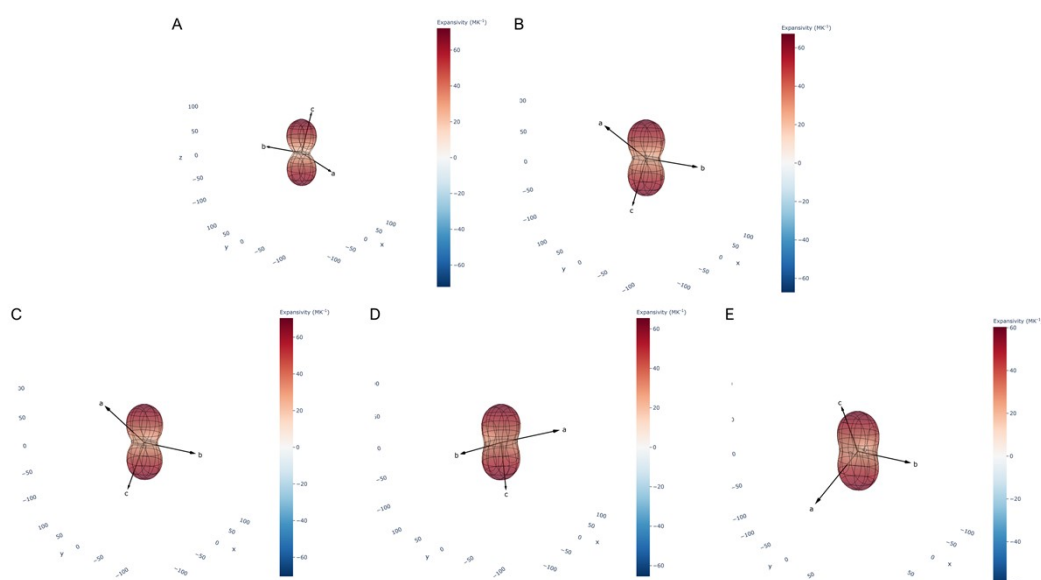

Figure S38. Expansivity indicatrix of PCV,  $\text{PCV}_{0.95}\text{-GCV}_{0.05}$ ,  $\text{PCV}_{0.90}\text{-GCV}_{0.10}$ ,  $\text{PCV}_{0.85}\text{-GCV}_{0.15}$ , and  $\text{PCV}_{0.80}\text{-GCV}_{0.20}$ , calculated using PasCal program.<sup>1</sup> A similar and gradually changing indicatrix indicates that the crystal structure and thermal expansion behavior undergo a systematic variation.

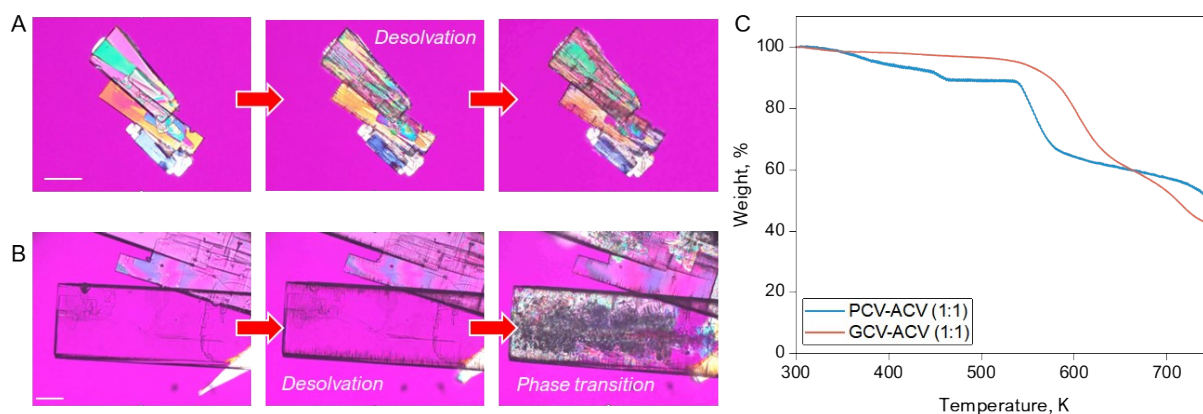

Figure S39. Screening and characterization of PCV-ACV and GCV-ACV solid solutions. (A) Desolvation and phase transition behavior of the PCV-ACV solid solution upon heating; (B) desolvation and phase transition behavior of the GCV-ACV solid solution upon heating; (C) TGA curves of PCV-ACV and GCV-ACV, indicating that both are solvates.

Table S1. Unit cell parameters of PCV, solid solutions, and GCV at 100 K across the composition range.

| GCV content, % | <i>a</i> , Å | <i>b</i> , Å | <i>c</i> , Å | $\alpha$ , ° | $\beta$ , ° | $\gamma$ , ° | <i>V</i> , Å <sup>3</sup> |
|----------------|--------------|--------------|--------------|--------------|-------------|--------------|---------------------------|
| 0              | 11.7371      | 10.7863      | 8.7252       | 90           | 99.281      | 90           | 1090.144                  |
| 5              | 11.7206      | 10.7763      | 8.7378       | 90           | 99.264      | 90           | 1089.23                   |
| 10             | 11.6948      | 10.785       | 8.7403       | 90           | 99.185      | 90           | 1088.26                   |
| 15             | 11.6533      | 10.7775      | 8.7377       | 90           | 99.186      | 90           | 1083.34                   |
| 20             | 11.6593      | 10.779       | 8.7538       | 90           | 99.138      | 90           | 1086.18                   |
| 30             | 11.6218      | 10.7919      | 8.7804       | 90           | 99.008      | 90           | 1087.67                   |
| 50             | 11.6008      | 10.7903      | 8.7106       | 90           | 98.684      | 90           | 1077.86                   |
| 100            | 11.4997      | 10.7687      | 8.6424       | 90           | 98.691      | 90           | 1057.96                   |

Table S2. Phase transition enthalpies ( $\Delta_{LTH_m}^{HT}$ ) of PCV crystal and solid solutions. The values decrease significantly with increasing GCV content, and for the PCV<sub>0.85</sub>-GCV<sub>0.15</sub> and PCV<sub>0.80</sub>-GCV<sub>0.20</sub> samples, accurate measurement was no longer possible.

|                                | PCV  | PCV <sub>0.95</sub> -GCV <sub>0.05</sub> | PCV <sub>0.90</sub> -GCV <sub>0.10</sub> | PCV <sub>0.85</sub> -GCV <sub>0.15</sub> | PCV <sub>0.80</sub> -GCV <sub>0.20</sub> |
|--------------------------------|------|------------------------------------------|------------------------------------------|------------------------------------------|------------------------------------------|
| $\Delta_{LTH_m}^{HT}$ , KJ/mol | 1.03 | 0.77                                     | 0.21                                     | < 0.1                                    | < 0.1                                    |

Table S3. Crystallographic data of the PCV<sub>0.90</sub>-GCV<sub>0.10</sub>, PCV<sub>0.70</sub>-GCV<sub>0.30</sub>, and PCV<sub>0.50</sub>-GCV<sub>0.50</sub>.

|                   | PCV                                                           | PCV <sub>0.90</sub> -GCV <sub>0.10</sub>                      | PCV <sub>0.70</sub> -GCV <sub>0.30</sub>                           | PCV <sub>0.50</sub> -GCV <sub>0.50</sub>                     | GCV Form II                                                  |
|-------------------|---------------------------------------------------------------|---------------------------------------------------------------|--------------------------------------------------------------------|--------------------------------------------------------------|--------------------------------------------------------------|
| Empirical formula | C <sub>10</sub> H <sub>15</sub> N <sub>5</sub> O <sub>3</sub> | C <sub>10</sub> H <sub>15</sub> N <sub>5</sub> O <sub>3</sub> | C <sub>9.7</sub> H <sub>14.4</sub> N <sub>5</sub> O <sub>3.3</sub> | C <sub>9</sub> H <sub>13</sub> N <sub>5</sub> O <sub>4</sub> | C <sub>9</sub> H <sub>13</sub> N <sub>5</sub> O <sub>4</sub> |
| CCDC number       | 2313630                                                       | 2520173                                                       | 2520172                                                            | 2520168                                                      | 714337 <sup>2</sup>                                          |
| Formula weight    | 253                                                           | 253.27                                                        | 253.86                                                             | 255.24                                                       | 255.24                                                       |
| Temperature/K     | 380                                                           | 100                                                           | 100                                                                | 100                                                          | 293.1                                                        |
| Crystal system    | monoclinic                                                    | monoclinic                                                    | monoclinic                                                         | monoclinic                                                   | monoclinic                                                   |
| Space group       | <i>P</i> 2 <sub>1</sub> / <i>c</i>                            | <i>P</i> 2 <sub>1</sub> / <i>c</i>                            | <i>P</i> 2 <sub>1</sub> / <i>c</i>                                 | <i>P</i> 2 <sub>1</sub>                                      | <i>P</i> 2 <sub>1</sub>                                      |
| <i>a</i> /Å       | 11.8542(16)                                                   | 11.7031(5)                                                    | 11.6218(8)                                                         | 4.3553(3)                                                    | 4.3803(15)                                                   |
| <i>b</i> /Å       | 10.8829(13)                                                   | 10.7835(4)                                                    | 10.7919(7)                                                         | 10.7903(7)                                                   | 10.909(4)                                                    |
| <i>c</i> /Å       | 8.9354(12)                                                    | 8.7394(4)                                                     | 8.7804(6)                                                          | 11.6008(9)                                                   | 11.601(4)                                                    |

|                                      |           |            |             |           |          |
|--------------------------------------|-----------|------------|-------------|-----------|----------|
| $\alpha/^\circ$                      | 90        | 90         | 90          | 90        | 90       |
| $\beta/^\circ$                       | 99.888(5) | 99.188(2)  | 99.008(3)   | 98.684(2) | 99.11(3) |
| $\gamma/^\circ$                      | 90        | 90         | 90          | 90        | 90       |
| $V/\text{\AA}^3$                     | 1135.6(3) | 1088.76(8) | 1087.67(13) | 538.93(7) | 547.4(3) |
| $Z$                                  | 4         | 4          | 4           | 2         | 2        |
| $\rho_{\text{calc}} \text{ cm}^{-3}$ | 1.481     | 1.545      | 1.550       | 1.573     | 1.549    |
| F(000)                               | 536.0     | 536.0      | 536.0       | 268.0     | 268.0    |

Table S4. Crystallographic data of the PCV<sub>0.95</sub>-GCV<sub>0.05</sub> and PCV<sub>0.85</sub>-GCV<sub>0.15</sub> polymorphs.

|                                      | PCV <sub>0.95</sub> -GCV <sub>0.05</sub>                      |                                                                      | PCV <sub>0.85</sub> -GCV <sub>0.15</sub>                      |                                                                                                                                  |
|--------------------------------------|---------------------------------------------------------------|----------------------------------------------------------------------|---------------------------------------------------------------|----------------------------------------------------------------------------------------------------------------------------------|
|                                      | LT form                                                       | HT form                                                              | LT form                                                       | HT form                                                                                                                          |
| Empirical formula                    | C <sub>10</sub> H <sub>15</sub> N <sub>5</sub> O <sub>3</sub> | C <sub>9.95</sub> H <sub>14.9</sub> N <sub>5</sub> O <sub>3.05</sub> | C <sub>10</sub> H <sub>15</sub> N <sub>5</sub> O <sub>3</sub> | C <sub>10</sub> H <sub>16</sub> N <sub>5</sub> O <sub>3</sub> ,2(C <sub>10</sub> H <sub>15</sub> N <sub>5</sub> O <sub>3</sub> ) |
| CCDC number                          | 2520171                                                       | 2520174                                                              | 2520169                                                       | 2520170                                                                                                                          |
| Formula weight                       | 253.27                                                        | 253.37                                                               | 253.27                                                        | 760.82                                                                                                                           |
| Temperature/K                        | 380                                                           | 420                                                                  | 400                                                           | 490                                                                                                                              |
| Crystal system                       | monoclinic                                                    | Triclinic                                                            | monoclinic                                                    | monoclinic                                                                                                                       |
| Space group                          | $P2_1/c$                                                      | $P\bar{1}$                                                           | $P2_1/c$                                                      | $P2_1/n$                                                                                                                         |
| $a/\text{\AA}$                       | 11.8369 (3)                                                   | 9.117 (4)                                                            | 11.7938 (3)                                                   | 13.6410 (5)                                                                                                                      |
| $b/\text{\AA}$                       | 10.8946 (3)                                                   | 10.951 (5)                                                           | 10.9225 (3)                                                   | 11.0691 (4)                                                                                                                      |
| $c/\text{\AA}$                       | 8.9309 (2)                                                    | 11.800 (4)                                                           | 8.9572 (3)                                                    | 23.4349 (9)                                                                                                                      |
| $\alpha/^\circ$                      | 90                                                            | 87.02 (3)                                                            | 90                                                            | 90                                                                                                                               |
| $\beta/^\circ$                       | 99.883 (1)                                                    | 80.55 (2)                                                            | 99.877 (2)                                                    | 93.007 (2)                                                                                                                       |
| $\gamma/^\circ$                      | 90                                                            | 86.23 (4)                                                            | 90                                                            | 90                                                                                                                               |
| $V/\text{\AA}^3$                     | 1134.62 (5)                                                   | 1158.6 (8)                                                           | 1136.75 (6)                                                   | 3533.7 (2)                                                                                                                       |
| $\rho_{\text{calc}} \text{ cm}^{-3}$ | 1.483                                                         | 1.453                                                                | 1.480                                                         | 1.430                                                                                                                            |
| $Z$                                  | 4                                                             | 4                                                                    | 4                                                             | 4                                                                                                                                |
| F(000)                               | 536.0                                                         | 536.0                                                                | 536.0                                                         | 1612.0                                                                                                                           |

Table S5. Unit cell parameters of a twinned PCV<sub>0.95</sub>-GCV<sub>0.05</sub> crystal at 420 K.

| $a, \text{\AA}$ | $b, \text{\AA}$ | $c, \text{\AA}$ | $\alpha, ^\circ$ | $\beta, ^\circ$ | $\gamma, ^\circ$ | $V, \text{\AA}^3$ | Ratio, % |
|-----------------|-----------------|-----------------|------------------|-----------------|------------------|-------------------|----------|
|-----------------|-----------------|-----------------|------------------|-----------------|------------------|-------------------|----------|

|          |        |         |         |        |        |        |        |       |
|----------|--------|---------|---------|--------|--------|--------|--------|-------|
| Domain-1 | 9.0715 | 10.8953 | 11.7790 | 87.239 | 80.461 | 86.134 | 1144.7 | 77.7% |
| Domain-2 | 9.0735 | 10.8942 | 11.7736 | 87.337 | 80.508 | 86.301 | 1144.7 | 21.5% |

Table S6. Summary of VT unit cell parameters for PCV crystal and solid solutions.

|                                          | $T, K$ | $a, \text{Å}$ | $b, \text{Å}$ | $c, \text{Å}$ | $\alpha, ^\circ$ | $\beta, ^\circ$ | $\gamma, ^\circ$ | $V, \text{Å}^3$ |
|------------------------------------------|--------|---------------|---------------|---------------|------------------|-----------------|------------------|-----------------|
| PCV                                      | 100    | 11.7371       | 10.7863       | 8.7252        | 90               | 99.2810         | 90               | 1090.144        |
|                                          | 140    | 11.7474       | 10.7931       | 8.7456        | 90               | 99.3817         | 90               | 1094.034        |
|                                          | 180    | 11.7557       | 10.8024       | 8.7656        | 90               | 99.4966         | 90               | 1097.886        |
|                                          | 220    | 11.7712       | 10.8098       | 8.7911        | 90               | 99.5718         | 90               | 1103.035        |
|                                          | 260    | 11.7883       | 10.8216       | 8.8178        | 90               | 99.6793         | 90               | 1108.854        |
| PCV <sub>0.95</sub> -GCV <sub>0.05</sub> | 100    | 11.7206       | 10.7763       | 8.7378        | 90               | 99.264          | 90               | 1089.23         |
|                                          | 140    | 11.7343       | 10.7871       | 8.754         | 90               | 99.333          | 90               | 1093.41         |
|                                          | 180    | 11.7496       | 10.7998       | 8.7746        | 90               | 99.427          | 90               | 1098.4          |
|                                          | 220    | 11.7625       | 10.8103       | 8.7957        | 90               | 99.528          | 90               | 1103            |
|                                          | 260    | 11.7813       | 10.8246       | 8.822         | 90               | 99.625          | 90               | 1109.21         |
| PCV <sub>0.90</sub> -GCV <sub>0.10</sub> | 100    | 11.6948       | 10.785        | 8.7403        | 90               | 99.185          | 90               | 1088.26         |
|                                          | 140    | 11.7105       | 10.7967       | 8.7571        | 90               | 99.252          | 90               | 1092.8          |
|                                          | 180    | 11.7257       | 10.8113       | 8.7752        | 90               | 99.389          | 90               | 1097.53         |
|                                          | 220    | 11.7421       | 10.8237       | 8.7976        | 90               | 99.487          | 90               | 1102.82         |
|                                          | 260    | 11.755        | 10.831        | 8.829         | 90               | 99.566          | 90               | 1108.463        |
| PCV <sub>0.85</sub> -GCV <sub>0.15</sub> | 100    | 11.6533       | 10.7775       | 8.7377        | 90               | 99.186          | 90               | 1083.34         |
|                                          | 140    | 11.6648       | 10.7870       | 8.7561        | 90               | 99.200          | 90               | 1087.59         |
|                                          | 180    | 11.6871       | 10.8145       | 8.7788        | 90               | 99.231          | 90               | 1095.20         |
|                                          | 220    | 11.7001       | 10.8214       | 8.7990        | 90               | 99.347          | 90               | 1099.26         |
|                                          | 260    | 11.7093       | 10.8340       | 8.8248        | 90               | 99.449          | 90               | 1104.34         |
| PCV <sub>0.80</sub> -GCV <sub>0.20</sub> | 100    | 11.6593       | 10.779        | 8.7538        | 90               | 99.138          | 90               | 1086.18         |
|                                          | 140    | 11.6743       | 10.7927       | 8.7679        | 90               | 99.206          | 90               | 1090.5          |
|                                          | 180    | 11.6828       | 10.8052       | 8.7862        | 90               | 99.307          | 90               | 1094.52         |
|                                          | 220    | 11.6968       | 10.8225       | 8.8112        | 90               | 99.427          | 90               | 1100.3          |
|                                          | 260    | 11.707        | 10.8361       | 8.8288        | 90               | 99.425          | 90               | 1104.8          |

Table S7. Principal axes of thermal expansion and corresponding coefficients for PCV crystal and solid solutions, calculated using PasCal program.

|                                              | Axes  | $\alpha$ (MK <sup>-1</sup> ) | $\sigma\alpha$ (MK <sup>-1</sup> ) | Direction |     |       |
|----------------------------------------------|-------|------------------------------|------------------------------------|-----------|-----|-------|
|                                              |       |                              |                                    | $a$       | $b$ | $c$   |
| PCV                                          | $X_1$ | 13.33                        | 1.81                               | 0.81      | 0   | 0.586 |
|                                              | $X_2$ | 20.2                         | 0.953                              | 0         | 1   | 0     |
|                                              | $X_3$ | 72.17                        | 1.855                              | -0.293    | 0   | 0.956 |
|                                              | $V$   | 106.5                        | 4.721                              |           |     |       |
| PCV <sub>0.95</sub> -<br>GCV <sub>0.05</sub> | $X_1$ | 17.8                         | 0.849                              | 0.771     | 0   | 0.636 |
|                                              | $X_2$ | 27.73                        | 0.637                              | 0         | 1   | 0     |
|                                              | $X_3$ | 67.3                         | 2.578                              | -0.352    | 0   | 0.936 |
|                                              | $V$   | 113.7                        | 4.056                              |           |     |       |
| PCV <sub>0.90</sub> -<br>GCV <sub>0.10</sub> | $X_1$ | 16.92                        | 1.03                               | 0.715     | 0   | 0.699 |
|                                              | $X_2$ | 27.52                        | 1.274                              | 0         | 1   | 0     |
|                                              | $X_3$ | 70.44                        | 2.898                              | -0.435    | 0   | 0.9   |
|                                              | $V$   | 115.8                        | 2.588                              |           |     |       |
| PCV <sub>0.85</sub> -<br>GCV <sub>0.15</sub> | $X_1$ | 34.1                         | 1.62                               | 0         | 1   | 0     |
|                                              | $X_2$ | 23.11                        | 2.518                              | 0.935     | 0   | 0.355 |
|                                              | $X_3$ | 65.45                        | 2.276                              | -0.098    | 0   | 0.995 |
|                                              | $V$   | 123.8                        | 2.838                              |           |     |       |
| PCV <sub>0.80</sub> -<br>GCV <sub>0.20</sub> | $X_1$ | 14.23                        | 1.557                              | 0.765     | 0   | 0.644 |
|                                              | $X_2$ | 33.31                        | 0.401                              | 0         | 1   | 0     |
|                                              | $X_3$ | 60.36                        | 1.866                              | -0.367    | 0   | 0.93  |
|                                              | $V$   | 108.8                        | 1.882                              |           |     |       |

## References

1. Lertkiattrakul, M.; Evans, M. L.; Cliffe, M. J., PASCAL Python: A Principal Axis Strain Calculator. *Journal of Open Source Software* **2023**, 8 (90), 5556.
2. Kawamura, T.; Hirayama, N., Crystal Structure of Ganciclovir. *X-ray Structure Analysis Online* **2009**, 25, 51-52.
